# Supplementary material for: High-Throughput Assay of Levansucrase Variants in Search of Feasible Catalysts for the Synthesis of Fructooligosaccharides and Levan
Source: PubMed Central journal article supplement (PMC6271050; doi:10.3390/molecules19068434), 2014-06-20
Supplement: molecules-19-08434-s001.pdf [file molecules-19-08434-s001.pdf]

## Supplementary Materials

**Table S1.** List of Lsc3 mutants and mutagenic oligonucleotides used in the study. Mutated codon is indicated on grey background and mutated nucleotides are underlined. Publications addressing the mutants are indicated. Some of mutants were designed to mimic respective mutants of *Zymomonas mobilis* levansucrase [1]. Mutagenesis was performed as shown in section 3.1 of the main text and in Ref [2].

| Mutation in Lsc3  | Mutagenic Primer | Primer Sequence (5'→3')               | Origin         |
|-------------------|------------------|---------------------------------------|----------------|
| Asp31Asn (D31N)   | D31NRev          | ACCTTCAGCGCAT <u>T</u> GGCG           | This work      |
| Trp61Ala (W61A)   | W61ARev          | ATGGTGTCC <u>G</u> GATGAATACCG        | [3]            |
| Trp61Asn (W61N)   | W61NRev          | ATGGTGT <u>C</u> GTTGATGAATACCG       | [3]            |
| Asp62Ala (D62A)   | D62ARev          | CATGGTGG <u>C</u> CCAGATGAAT          | [3]            |
| Thr63Ala (T63A)   | T63ARev          | AGCGGCATGG <u>C</u> GTCCAGATG         | [3]            |
| Leu66Ala (L66A)   | L66ARev          | TCTCGC <u>G</u> CCGGCATGGTG           | [3]            |
| Trp109Ala (W109A) | W109ARev         | TGTCGATCTTCC <u>G</u> CGTCACGC        | This work      |
| Trp109Phe (W109F) | W109FRev         | TGTCGATCTT <u>C</u> AAAGTCACGC        | This work      |
| Trp109Arg (W109R) | W109RRev         | TGTCGATCTTCC <u>C</u> GGTCACGC        | [1]; this work |
| Glu110Asp (E110D) | E110DRev         | ATGTCGATC <u>G</u> TCCCAGTCACGC       | This work      |
| His113Ala (H113A) | H113ARev         | CGCGGCCA <u>G</u> CTCGATCTTCC         | This work      |
| His113Gln (H113Q) | H113QRev         | GCGTGC <u>G</u> CGGCC <u>T</u> TGTCG  | This work      |
| Glu146Gln (E146Q) | E146QRev         | GGTGTGCCCCGCCA <u>C</u> TGTCGAGTGGTGG | [1]; this work |
| Asp219Ala (D219A) | D219ARev         | ACTGGGG <u>G</u> CGCGAAAGTTC          | [3]            |
| Pro220Ala (P220A) | P220ARev         | ATGAACGGACTGG <u>C</u> GTGCGG         | [3]            |
| Asp225Ala (D225A) | D225ARev         | CATCATTAGGG <u>G</u> CAATGAACGGAC     | [3]            |
| Asp225Asn (D225N) | D225NRev         | CATCATTAGGAT <u>A</u> AATGAACGGAC     | [3]            |
| Glu236Gln (E236Q) | E236QRev         | TCACCGGCGACATTG <u>C</u> CTGAAACACCA  | [1]; this work |
| Val248Ala (V248A) | V248AFw          | TTCGCACACAG <u>C</u> AGGGGTTGC        | [1]; this work |
| Asp300Ala (D300A) | D300AFw          | GGCGTGAATG <u>C</u> GACACCGAG         | This work      |
| Asp300Asn (D300N) | D300NFw          | TGAAT <u>A</u> ATCAGACCGAGCGCC        | [2]            |
| Gln301Ala (Q301A) | Q301AFw          | TGAATGATG <u>C</u> GACCGAGCGC         | [3]            |
| Gln301Glu (Q301E) | Q301EFw          | TGAATGATGAGACCGAGCGC                  | [3]            |
| Thr302Met (T302M) | T302MFw          | AATGATCAGATG <u>G</u> GAGCGCCC        | [3]            |
| Thr302Pro (T302P) | T302PFw          | AATGATCAG <u>C</u> CCGAGCGCCC         | [2]            |
| Glu303Ala (E303A) | E303AFw          | TGATCAGACCG <u>C</u> GCGCC            | [3]            |
| Glu303Gln (E303Q) | E303QFw          | TGATCAGAC <u>C</u> CAGCGCCCCG         | This work      |
| Arg304Ala (R304A) | R304AFw          | TCAGACCGAGG <u>C</u> CCCCGCACTATG     | [3]            |
| Arg304Cys (R304C) | R304CFw          | TCAGACCGAGT <u>G</u> CCCCGCACTATG     | [3]            |
| His306Ala (H306A) | H306AFw          | AGCGCCC <u>G</u> CCATGTTTTTCAAG       | [3]            |
| His321Leu (H321L) | H321LFw          | CACCATCAGT <u>C</u> TGAAGTTCACGTATGCC | [2]            |
| His321Lys (H321K) | H321KFw          | CACCATCAGT <u>A</u> AAAAGTTCACGTATGCC | [2]            |
| His321Arg (H321R) | H321RFw          | CACCATCAGT <u>C</u> GCAAGTTCACGTATGCC | [2]            |
| His321Ser (H321S) | H321SFw          | CACCATCAGT <u>A</u> GCAAGTTCACGTATGCC | [2]            |
| Asp333Ala (D333A) | D333AFw          | GGGCCAG <u>C</u> GGGGTGTACGG          | This work      |
| Asp333Asn (D333N) | D333NFw          | GGGCCA <u>A</u> ACGGGGTGTACGG         | [1]; this work |

**Figure S1.** Typical high-performance liquid chromatography (HPLC) analysis of reaction products of Lsc3 wild-type (Lsc3 wt; upper panel) and a mutant with reduced catalytic activity (e.g. Leu66Ala; lower panel) conducted using CTAB-permeabilized cells (violet line) or purified protein (red line). Peaks corresponding to fructose (F), glucose (G), sucrose (S) and FOS with degree of polymerization (DP) 3 to 6 are designated. Detection sensitivity was reduced to fully accommodate the peaks of glucose and sucrose. Due to that, FOS with DP > 5 cannot be seen on the chromatogram. Lsc3 wt and Leu66Ala mutant both synthesize FOS with DP up to 7 (see Table 1 of the main text and Ref [3]). Reactions were performed as shown in sections 3.5 and 3.6 of the main text and products were analyzed by HPLC as in section 3.9 and Ref [3]. LSU – light scattering unit determined on evaporative light scattering (ELS) detector.

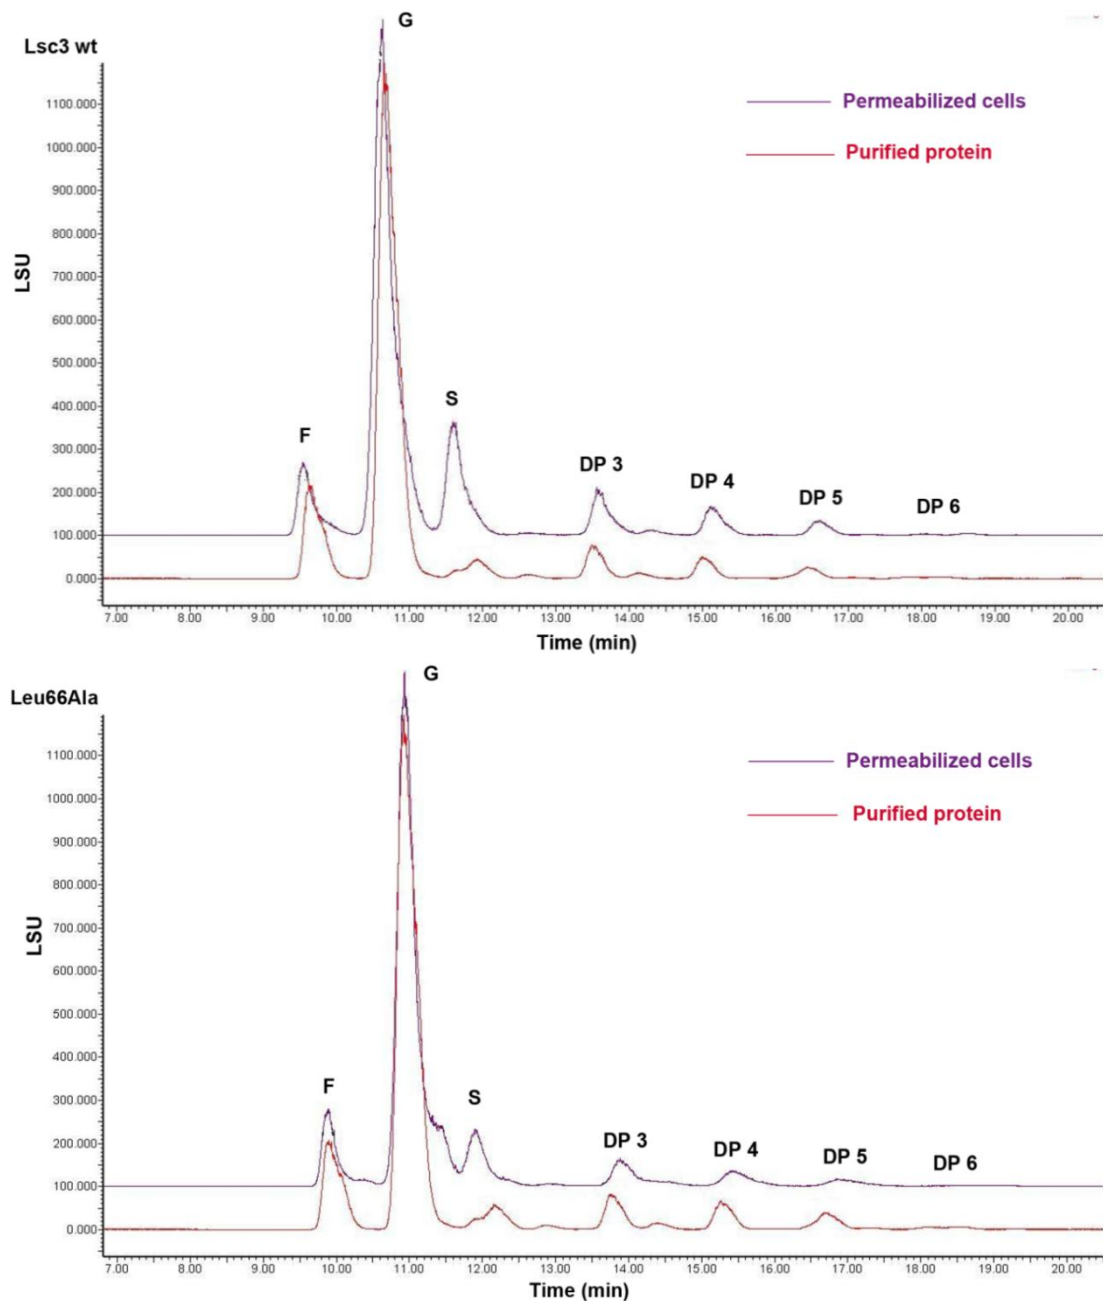

**Figure S2.** Alignment of protein sequences of 22 levansucrases. Fragment containing the position corresponding to Asp31 of *Pseudomonas syringae* pv. tomato levansucrase Lsc3 is shown and Asp31 residue is indicated as # above the MUSCLE [4] alignment. Sequences were extracted from UniProt [5] database. Levansucrase protein sequences of following bacteria are shown: *Pseudomonas syringae* pv. phaseolicola, *Serratia odorifera*, *Pseudomonas fluorescens*, *Rahnella aquatilis*, *Erwinia amylovora*, *Pseudomonas chlororaphis* subsp. *aurantiaca*, *Zymomonas mobilis*, *Gluconobacter oxydans*, *Gluconacetobacter diazotrophicus*, *Beijerinckia indica*, *Burkholderia phymatum*, *Burkholderia pseudomallei*, *Clostridium acetobutylicum*, *Streptomyces viridochromogenes*, *Cellulomonas flavigena*, *Actinomyces viscosus*, *Halorubrum lacusprofundi*, *Halalkalicoccus jeotgali*, *Halomicrobium mukohataei*, *Haloarcula marismortui*, *Bacillus subtilis*.

|                   |                              | Asp31N |         |       |         |        |        |            |        |      |       |     |    |
|-------------------|------------------------------|--------|---------|-------|---------|--------|--------|------------|--------|------|-------|-----|----|
|                   |                              | #      |         |       |         |        |        |            |        |      |       |     |    |
| Q88BN6            | Lsc3 <i>P. s.pv.tomato</i>   | IKYPP  | TV---   | WSRAD | ALK     | VNEND  | PTT--  | -----      | TPPLV  | SAD  | FFP   | 52  |    |
| Q48BC9            | <i>P. s.pv.phaseolicola</i>  | INYE   | PTV---  | WSRAD | ALK     | VNEND  | PTT--  | -----      | TPPLV  | SAD  | FFP   | 52  |    |
| D4E4H9            | <i>S. odorifera</i>          | VNYK   | PTI---  | WTRAD | ALK     | VNEKD  | PTT--  | -----      | TPPLV  | SAD  | FFP   | 36  |    |
| C3K8D6            | <i>P. fluorescens</i>        | ANHT   | PTR---  | WTRAD | ALK     | VNEND  | PTT--  | -----      | TPPLV  | SPD  | FFP   | 36  |    |
| O54435            | <i>R. aquatilis</i>          | LNYP   | PTI---  | WTRAD | ALK     | VNEND  | PTT--  | -----      | TPPIV  | DAD  | FFP   | 36  |    |
| Q46654            | <i>E. amylovora</i>          | YNYK   | PTL---  | WTRAD | ALK     | VHEDD  | PTT--  | -----      | TPPVI  | DI   | IAFFP | 36  |    |
| Q93FU9            | <i>P. c.subsp.aurantiaca</i> | APHQ   | PSL---  | WTRAD | ALK     | VHADDP | TT--   | -----      | TPPLV  | SAD  | FFP   | 43  |    |
| P0DJA3            | <i>Z. mobilis</i>            | GIAE   | PSL---  | WTRAD | AMK     | VHTDD  | PTA--  | -----      | TMPTI  | DYD  | FFP   | 38  |    |
| Q5FSK0            | <i>G. oxydans</i>            | SSTQ   | SATQSG  | SRWT  | ADAMK   | IHTDD  | PTT--  | -----      | TMPTI  | DY   | IAFFP | 42  |    |
| Q43998            | <i>G. diazotrophicus</i>     | QAYD   | PQSDFT  | ARW   | TRADALQ | IKAHS  | DATVA  | AGQNSLPAQL | TPNIN  | PAD  | FFP   | 125 |    |
| B2IF78            | <i>B. indica</i>             | QAYD   | PQSDFT  | AKW   | TRANARQ | IKAQSH | VPVS   | PDQNSLPLNL | TMPTI  | PAD  | FFP   | 90  |    |
| B2JVY2            | <i>B. phymatum</i>           | QAYD   | PQSDFT  | MRW   | TRADIRQ | IKAQSH | AAATA  | ADKNSLPLSL | TMPTI  | PQD  | FFP   | 100 |    |
| Q3JGQ0            | <i>B. pseudomallei</i>       | QAYD   | PQSDFT  | MRW   | TRADMRQ | IVKQSH | TA-G   | ADKNSLPPAL | TMPTI  | IAQ  | NFFP  | 95  |    |
| Q97I79            | <i>C. acetobutylicum</i>     | LILR   | HNTGYT  | SIWS  | RQQAQN  | FKCT   | KEN--  | -----      | TAPNIN | PNFK |       | 61  |    |
| D9X8L9            | <i>S. viridochromogenes</i>  | RQYT   | ADDDHT  | AVWS  | RADALK  | LKQDR  | TN---  | -----      | TAPRV  | SPD  | FFP   | 77  |    |
| D5UCP7            | <i>C. flavigena</i>          | AVFS   | PRSSYT  | ANW   | TRADALQ | IRQD   | ASN--- | -----      | TKPRI  | PAE  | FFP   | 98  |    |
| F2V1I2            | <i>A. viscosus</i>           | AAHG   | V EENYT | AKW   | TRADAMQ | IQRV   | SNPNAP | SGTNSMPEQL | TMPEI  | ISNG | FFP   | 166 |    |
| B9LT89            | <i>H. lacusprofundi</i>      | GRSR   | SR---   | WTR   | EQAAS   | IERR   | RGN--- | -----      | IAPP   | AGAP | EL    | 40  |    |
| D8J9C2            | <i>H. jeotgali</i>           | GRAT   | PR---   | WTR   | EHASK   | IERT   | DET--- | -----      | VVPI   | IYPP | RE    | 37  |    |
| C7P4M9            | <i>H. mukohataei</i>         | GTAV   | EGHGAR  | SGW   | SREQASR | IERT   | DDT--- | -----      | TAPI   | IYPP | PAT   | 43  |    |
| Q5V249            | <i>H. marismortui</i>        | GEGR   | SGTKGR  | AGW   | TREQASR | IERT   | DDT--- | -----      | VAPI   | IYPP | QPT   | 43  |    |
| P05655            | <i>B. subtilis</i>           | KPYK   | EYTGIS  | H-ITR | ADMLO   | IPEQ   | QKNE-- | -----      | KY     | QVE  | EFDS  | STI | 73 |
| Clustal Consensus |                              |        |         | :     | :       | :      | :      | :          | *      |      |       |     |    |

## References

1. Yanase, H.; Maeda, M.; Hagiwara, E.; Yagi, H.; Taniguchi, K.; Okamoto, K. Identification of functionally important amino acid residues in *Zymomonas mobilis* levansucrase. *J. Biochem.* **2002**, *132*, 565–572.
2. Visnapuu, T.; Mardo, K.; Mosoarca, C.; Zamfir, A.D.; Vigants, A.; Alam äe T. Levansucrases from *Pseudomonas syringae* pv. tomato and *P. chlororaphis* subsp. *aurantiaca*: Substrate specificity, polymerizing properties and usage of different acceptors for fructosylation. *J. Biotechnol.* **2011**, *155*, 338–349.
3. Mardo, K.; Visnapuu, T.; Vija, H.; Elmi, T.; Alam äe, T. Mutational analysis of conserved regions harboring catalytic triad residues of the levansucrase protein encoded by the *lsc-3* gene (*lsc3*) of *Pseudomonas syringae* pv. tomato DC3000. *Biotechnol. Appl. Biochem.* **2014**, *61*, 11–22.
4. Edgar, R.C. MUSCLE: multiple sequence alignment with high accuracy and high throughput. *Nucleic Acids Res.* **2004**, *32*, 1792–1797.
5. The UniProt Consortium. Activities at the universal protein resource (UniProt). *Nucleic Acids Res.* **2014**, *42*, 191–198.
